# Supplementary material for: Biaxial Flexural Strength of Printed Splint Materials
Source: MDPI journal article supplement (doi:10.3390/ma17051112), 2024-02-28
Supplement: s1 [file s1]

**Table S1.** Biaxial flexural strength (BFS in MPa, mean, standard deviation [SD]) of the materials after different orientation to the building platform, cleaning, post-polymerization, and storage time in water.

| Orientation to<br>building<br>platform | Material | Cleaning | Post-<br>polymerization | storage<br>time<br>(water<br>37°C) | BAF   |      |
|----------------------------------------|----------|----------|-------------------------|------------------------------------|-------|------|
|                                        |          |          |                         |                                    | mean  | SD   |
| 90°                                    | M1       | AUTO     | LED                     | 24 h                               | 125.2 | 5.3  |
|                                        |          |          |                         | 60 d                               | 119.7 | 7.5  |
|                                        |          |          | XEN                     | 24 h                               | 119.3 | 12.8 |
|                                        |          |          |                         | 60 d                               | 112.8 | 12.6 |
|                                        |          | MAN      | LED                     | 24 h                               | 121.3 | 14.9 |
|                                        |          |          |                         | 60 d                               | 106.9 | 14.2 |
|                                        |          |          | XEN                     | 24 h                               | 83.3  | 6.9  |
|                                        |          |          |                         | 60 d                               | 82.8  | 8.3  |
|                                        | M2       | AUTO     | LED                     | 24 h                               | 157.5 | 16.2 |
|                                        |          |          |                         | 60 d                               | 127.1 | 6.9  |
|                                        |          |          | XEN                     | 24 h                               | 122.1 | 11.6 |
|                                        |          |          |                         | 60 d                               | 89.5  | 7.5  |
|                                        |          | MAN      | LED                     | 24 h                               | 145.8 | 11.5 |
|                                        |          |          |                         | 60 d                               | 120.3 | 11.9 |
|                                        |          |          | XEN                     | 24 h                               | 127.9 | 8.0  |
|                                        |          |          |                         | 60 d                               | 89.8  | 5.8  |
| 45°                                    | M1       | AUTO     | LED                     | 24 h                               | 109.6 | 28.8 |
|                                        |          |          |                         | 60 d                               | 101.7 | 15.3 |
|                                        |          |          | XEN                     | 24 h                               | 95.1  | 10.1 |
|                                        |          |          |                         | 60 d                               | 83.0  | 9.6  |
|                                        |          | MAN      | LED                     | 24 h                               | 122.2 | 20.4 |
|                                        |          |          |                         | 60 d                               | 116.5 | 14.6 |
|                                        |          |          | XEN                     | 24 h                               | 100.6 | 14.8 |
|                                        |          |          |                         | 60 d                               | 90.7  | 13.3 |
|                                        | M2       | AUTO     | LED                     | 24 h                               | 111.1 | 17.3 |
|                                        |          |          |                         | 60 d                               | 95.3  | 17.8 |
|                                        |          |          | XEN                     | 24 h                               | 104.2 | 13.8 |
|                                        |          |          |                         | 60 d                               | 78.6  | 12.5 |
|                                        |          | MAN      | LED                     | 24 h                               | 106.5 | 23.9 |
|                                        |          |          |                         | 60 d                               | 84.4  | 17.0 |
|                                        |          |          | XEN                     | 24 h                               | 101.4 | 15.2 |
|                                        |          |          |                         | 60 d                               | 72.7  | 15.4 |
| 0°                                     | M1       | AUTO     | LED                     | 24 h                               | 105.4 | 16.9 |
|                                        |          |          |                         | 60 d                               | 107.4 | 9.1  |
|                                        |          |          | XEN                     | 24 h                               | 91.1  | 15.0 |
|                                        |          |          |                         | 60 d                               | 95.5  | 6.9  |
|                                        |          | MAN      | LED                     | 24 h                               | 116.7 | 12.1 |
|                                        |          |          |                         | 60 d                               | 109.6 | 15.4 |
|                                        |          |          | XEN                     | 24 h                               | 98.5  | 6.4  |
|                                        |          |          |                         | 60 d                               | 91.3  | 5.1  |
|                                        | M2       | AUTO     | LED                     | 24 h                               | 119.4 | 25.9 |

|     |     |      |       |      |
|-----|-----|------|-------|------|
| MAN | XEN | 60 d | 93.2  | 24.8 |
|     |     | 24 h | 78.6  | 11.1 |
|     |     | 60 d | 71.9  | 13.5 |
|     | LED | 24 h | 141.3 | 9.3  |
|     |     | 60 d | 102.9 | 13.0 |
|     | XEN | 24 h | 115.2 | 14.9 |
|     |     | 60 d | 90.9  | 11.7 |
